# Supplementary material for: Virome Temporal Variation During Sea Star Wasting Disease Progression in Pisaster ochraceus (Asteroidea, Echinodermata)
Source: Preprints.org preprint supplement (doi:10.20944/preprints202010.0171.v1), 2020-10-08
Supplement: Supplementary file 1 [file supplementary]

Bihai mantis shrimp virus YP 009333273.1  
Wud crab virus YP 004063985.1  
Wenzhou shrimp virus 7 YP 009333162.1  
Bihai mantis shrimp virus 5 YP 009333197.1  
*Macrobrachium rosenbergii* Taihu virus YP009336653.2  
Auricular syndrome virus AA181 YP 009336613.1  
Jenning picorna-like virus 9 YP 009336613.1  
Bihai picorna-like virus 9 YP 009336613.1  
Bihai picorna-like virus 9 YP 009336613.1  
Wenzhou shrimp virus 6 APG788.1  
Wenzhou picorna-like virus YP 009336706.1  
*Nilaparvata lugens* virus YP009336706.1  
Bihai picorna-like virus 76 AP571390.1  
*Bactrocera dorsalis* cinapavirus QSG5551.1  
Hubei picorna-like virus 16 YP 009336583.1  
Darwin bee virus YP009336584.1  
Ampyral virus AMO3208  
Sundaberg bee virus 3 AWK77856.1  
*Drosophila kikkawai* virus YP 009336581.1  
Hubei diptera virus 1 YP 009336581.1  
Wenzhou picorna-like virus YP 009336976.1  
Jenning picorna-like virus YP 009336903.1  
Wenzhou shrimp virus YP 009336883.1  
Changjiang picorna-like virus 13 YP 009336781.1  
*Picornavirales* sp. QJ153517781.1  
Robinvale bee virus 1 YP 009333496.1  
Hubei picorna-like virus YP 009333496.1  
Hubei picorna-like virus 85 YP 009333551.1  
Caledonia beaded anemone dicistro-like virus 1 ASM93979.1  
Wenling picorna-like virus YP 009333180.1  
Hailan virus 1 AYN15549  
Bivalve RNA virus G5 YP 009329822.1  
*Picornavirales* N OV 023 ASG92545.1  
*Picornavirales* N OV 023 ASG92545.1  
*Picornavirales* Q SR OV 042 ASG92538.1  
Bihai mantis shrimp virus YP 009333215.1  
*Picornaviridae* sp. QJ15350317781.1  
Maize chlorotic dwarf virus AA468083.1  
Rice tungro spherical virus CAAB/042.1  
Mulberry mosaic leaf roll associated virus YP 009507923.1  
Hobart nepovirus 3 AWK779050461.1  
Curcubit mild mosaic virus AS 00897670.1  
Spinum mild mosaic virus YP 00897670.1  
Broad bean wilt virus 2 AA442056.1  
Cherry virus F AWB36330  
Arabidopsis latent virus 1 QCE32095.1  
Bean rugose mosaic virus YP 0093303.1  
Bean pod mottle virus YP 0093303.1  
Andean potato mottle virus QHW16320.1  
Papaya comovirus QHB15138  
Pepper mild mosaic virus QES1272.1  
Turnip ringspot virus ABG53688.1  
Comovirus sp. YP 00933684.1  
Cowpea severe mosaic virus NP 734062.1  
Radish mosaic virus QD75760.1  
Radish mosaic virus YP 00191126.1  
Darwin bee virus YP 0093743.1  
Sacbrood virus AF 0093743.1  
Loch Morlich virus QAY29256.1  
*Iflaviridae* sp. QKN89068  
Tomato matilda virus QJW80878.1  
*Neophila claypaves* virus YP 00933501.1  
Urban spider virus YP 009328861.1  
Kinkell virus AMO3216.1  
Lampyris noctuella flavivirus 2 QBP37020.1  
*Picornavirales* sp. QKN88840  
Hubei picorna-like virus 30 YP 009337722.1  
*Neobolus castaneus* flavivirus QES905.1  
Sundaberg bee virus YP 00933782.1  
BKG bee virus 13 QKW94218  
Hubei picorna-like virus 26 YP 009337003.1  
*Helicoverpa armigera* flavivirus YP 009344360.1  
*Nodelphax stratiellae* flavivirus YP 009344360.1  
*Nilaparvata lugens* virus YP 009344360.1  
*Haemaphysalis flava* flavivirus BKB20270.1  
Hubei tick virus 3 YP 009336533.1  
Hubei tick virus 2 YP 009336533.1  
Hubei tick virus 1 YP 009336533.1  
*Kodops scapularis* flavivirus BBP75427.1  
Bat flavivirus YP 009345906.1  
Slow bee paralysis virus AD146683.1  
Moku virus YP 009350542.1  
Hubei tetragrassh maxillovirus 2 APG76669.1  
Scarmotetrix flavivirus YP 00935259.1  
*Scaphoideus flatus* flavivirus YP 00935091.1  
Hubei picorna-like virus 49 YP 009336567.1  
*Picornavirales* sp. QDH878  
Hubei picorna-like virus YP 009337045.1  
Urban spider virus YP 009345026.1  
Bihai picorna-like virus 106 YP 009333579.1  
Hubei picorna-like virus 46 YP 0093330031.1  
*Picornavirales* sp. QJ153584.1  
*Picornavirales* sp. QJ153584.1  
Baker virus AOX5252.1  
Hubei tetragrassh maxillovirus 3 YP 009337339.1  
Bovina sp. QKN88026  
*Picornavirales* sp. QJ153586  
*Picornavirales* sp. QJ153586  
Jenning picorna-like virus 15 YP 009336663.1  
*Picornavirales* sp. QKN88969.1  
Rainer virus AOX5252.1  
Antarctic picorna-like virus 1 YP 009255227.1  
Saxxia picorna-like virus 2 YP 009333141.1  
*Basavirus* sp. QJ153586  
Wuhan insect virus 10 YP 009342445.1  
*Basavirus* sp. AP 044496  
Hubei picorna-like virus 9 YP 009337369.1  
Bihai picorna-like virus 65 YP 009336541.1  
Wenzhou picorna-like virus 14 YP 009337672.1  
*Biophaphala* virus 2 YP 009342320.1  
Pittsburgh sewage-associated virus 1 AYA16916.1  
Hubei picorna-like virus 13 YP 009337372.1  
*Picornavirales* sp. QJ153535.1  
Hubei picorna-like virus YP 009336529.1  
*Picornavirales* sp. QKN88962  
*Picornavirales* sp. QKN88962  
*Pisaster ochraceus* conp 91247  
*Iflaviridae* sp. QKN88071.1  
*Iflaviridae* sp. QKN88071.1  
*Iflaviridae* sp. QKN88071.1

Rudhvi virus 4 AYN/5570.1  
Wenzhou gastropodes virus 1 YP 009337410.1  
Wenzhou picorna-like virus 5 YP 009336636.1  
Beihai paphia shell virus 1 APG78968.1  
Wenzhou picorna-like virus 5 YP 009337363.1  
Beihai picorna-like virus 23 APG78947.1  
Marine RNA virus BC-4 YP 0093667032.1  
Picornavirales Q SR OV 019 ASG92548.1  
Wenzhou picorna-like virus 5 APG76682.1  
Rudhvi virus 5 YP 009553172.1  
**Pisaster ochraceus contig 52019**  
Beihai octopus virus 1 YP 009333282.1  
Beihai picorna-like virus 21 YP 009333574.1  
Barns Ness breadcrumb sponge aquatic picorna-like virus 2 ASM94054.1  
Mytilus virus 1 AYN7556.2  
*Cylindrothecla closterium* RNA virus 02 QB9Y91921.1  
Barns Ness breadcrumb sponge aquatic picorna-like virus 3 ASM94056.1  
Beihai picorna-like virus 5 YP 009337310.1  
Beihai picorna-like virus 20 YP 009333587.1  
Wenzhou picorna-like virus 7 YP 009333715.1  
Nitzschia reversa RNA virus BBJ06070.1  
*Cylindrothecla closterium* RNA virus 03 QB9Y91923.1  
Wenzhou picorna-like virus 52 YP 009337247.1  
Picornavirales N OV 039 ASG92521.1  
Barns Ness breadcrumb sponge aquatic picorna-like virus 1 ASM94052.1  
Beihai picorna-like virus 14 YP 009333555.1  
Beihai picorna-like virus 14 YP 009333555.1  
Marnaviridae sp. QJN36626.1  
Bat dichobavirus YP 009345908.1  
Marine RNA virus PAL473 YP 009230125.1  
Beihai paphia shell virus 1 YP 009333343.1  
Beihai picorna-like virus 29 APG78939.1  
Marine RNA virus PAL428 YP 009230119.1  
Marnaviridae sp. QJN33802.1  
Beihai picorna-like virus 51 YP 0093333601.1  
Beihai picorna-like virus 30 YP 009333431.1  
*Inderbia crustacea* marnavirus QKQ15127.1  
Marine RNA virus BC-7 AYD08 YP 009333557.1  
Marine RNA virus BC-1 YP 009366885.1  
Wenzhou picorna-like virus 4 YP 009337401.1  
Picornavirales sp. QDH86882.1  
Wenzhou picorna-like virus 2 YP 009336647.1  
Hubei picorna-like virus 1 YP 009337719.1  
*Kummerowia sinata* marnavirus QKQ15138.1  
Picornavirales N OV 011 ASG92523.1  
Cragic virus 1 YP 009553172.1  
Halds virus QNM80718.1  
Beihai picorna-like virus 42 YP 009333385.1  
Wenzhou picorna-like virus 14 YP 009337719.1  
Beihai picorna-like virus 2 YP 009333404.1  
Marine RNA virus J-P A YP 00142558.1  
Wenzhou picorna-like virus 50 YP 009337858.1  
Beihai picorna-like virus 26 YP 009333363.1  
Beihai picorna-like virus 4 YP 009333567.1  
*Chaetoceros* species RNA virus 02 BAK40204.1  
*Chaetoceros tenuissimus* RNA virus type-1 BAP99821.1  
*Guinardia delicatula* RNA virus 01 YP 96585.1  
Beihai picorna-like virus 18 YP 009333476.1  
Beihai sesarimid crab virus 1 YP 009333438.1  
Beihai picorna-like virus 26 YP 009333383.1  
Shane picorna-like virus 3 YP 009333628.1  
Antarctic picorna-like virus 2 YP 009255230.1  
Beihai picorna-like virus 39 YP 009333482.1  
Beihai picorna-like virus 16 APG76689.1  
Wenzhou picorna-like virus 13 YP 009337228.1  
Changjiang crawfish virus 1 YP 009337801.1  
Saxia picorna-like virus 5 YP 009337801.1  
Cragic virus 8 QBP32760.1  
*Rhizosolenia setigera* RNA virus 01 YP 006732324.1  
**Pisaster ochraceus contig 87889**  
Wenzhou picorna-like virus 12 YP 009336941.1  
Beihai picorna-like virus 24 YP 009333561.1  
Wenzhou picorna-like virus 2 YP 009337186.1  
Beihai picorna-like virus 2 YP 009333426.1  
*Chaetoceros tenuissimus* RNA virus 01 YP 009505621.1  
Beihai picorna-like virus 55 YP 009333427.1  
Picornavirales N OV 080 ASG92525.1  
**Pisaster ochraceus contig 12033**  
**Pisaster ochraceus contig 82070**  
Beihai picorna-like virus 19 YP 009333584.1  
Beihai picorna-like virus 2 YP 009336708.1  
Beihai picorna-like virus 28 YP 009333569.1  
*Chaetoceros socialis* forma radians RNA virus 1 YP 002647033.1  
Marine RNA virus PAL E4 YP 009230127.1  
Picornavirales N OV 013 ASG92531.1  
Wenzhou picorna-like virus 10 YP 009337154.1  
Earth bee virus 1 LWK1000.1  
Picornavirales N OV 003 ASG92535.1  
Beihai picorna-like virus 5 YP 009332955.1  
Barns Ness breadcrumb sponge aquatic picorna-like virus 5 ASM94060.1  
Beihai mollusks virus 1 APG78765.1  
Beihai picorna-like virus 11 YP 009333582.1  
Wenzhou picorna-like virus 1 YP 009337374.1  
Barns Ness breadcrumb sponge aquatic picorna-like virus 4 ASM94058.1  
Marine RNA virus BC-3 YP 009366881.1  
Beihai picorna-like virus 8 YP 009333429.1  
Wenzhou picorna-like virus 52 YP 009336662.1  
Beihai picorna-like virus 9 YP 009333529.1  
Marine RNA virus BC-3 YP 009366881.1  
Fur seal picorna-like virus 0093368486.1  
Marine RNA virus PAL 156 YP 009230145.1  
Beihai picorna-like virus 6 YP 009333435.1  
Beihai picorna-like virus 5 YP 009333436.1  
Beihai sipunculid worm virus 2 YP 009333440.1  
Beihai sipunculid worm virus 3 YP 009333350.1  
*Asterionellopsis glacialis* RNA virus YP 003047194.1  
Beihai sipunculid worm virus 4 YP 009333527.1  
Beihai mollusks virus 33 YP 009333599.1  
Beihai mollusks virus 2 APG78925.1  
**Pisaster ochraceus contig 83691**  
Beihai picorna-like virus 35 YP 0093330025.1  
Wenzhou picorna-like virus 1 APG78584.1

Acute bee paralysis virus QGX47957.1  
Kashmir bee virus QGN03906.1  
Israeli acute paralysis virus ABY57949.1  
*Plasmopara viticola* lesion associated dicistro-like virus 1 QHD64741.1  
PNG bee virus 2 QKW94203.1  
Halhan virus 3 YP 009552715.1  
Picornavirales Q sR OV 011 ASG92550.1  
Beihai picorna-like virus 72 YP 009333547.1  
Beihai picorna-like virus 74 YP 009333558.1  
Bemisia-associated dicistrovirus 1 AZB50980.1  
*Dicistroviridae* sp. QJ152024.1  
Caledonia beadlet anemone dicistro-like virus 2 ASM93984.1  
Wenzhou picorna-like virus 27 YP 009336706.1  
*Dicistroviridae* TZ-3 QCO76499.1  
Triatoma virus NP 620562.1  
Himetobi P virus NP 620560.1  
Serbia picorna-like virus 1 QNS17456.1  
Black queen cell virus ABS82407.1  
Renmark bee virus 1 AWK77866.1  
*Dicistroviridae* sp. QJ151999.1  
Bat dicistrovirus AWU67494.1  
*Dicistroviridae* sp. QJ152055.1  
Wuhan arthropod virus 2 QGN03908.1  
Rosaceae-associated triatovirus 1 QJY30839.1  
*Dicistroviridae* sp. QJ152045.1  
*Dicistroviridae* sp. QJ152200.1  
*Dicistroviridae* sp. QJ152216.1  
Bivalve RNA virus G1 YP 009329817.1  
Picornavirales N OV 008 ASG92528.1  
Beihai picorna-like virus 85 YP 009333551.1  
Caledonia beadlet anemone dicistro-like virus 1 ASM93979.1  
Wenling picorna-like virus 2 YP 009333180.1  
*Picornavirales* Q sR OV 042 ASG92538.1  
*Picornavirales* Q sR OV 023 ASG92545.1  
Wenling crustacean virus 3 YP 009336743.1  
Bivalve RNA virus G5 YP 009329822.1  
Halhan virus 1 AYN75548.1  
*Pisaster ochraceus* contig 93124  
Beihai mantis shrimp virus 3 YP 009333215.1  
Wenzhou shrimp virus 4 YP 009337036.1  
Wenzhou shrimp virus 5 YP 009336682.1  
Beihai picorna-like virus 84 YP 009333496.1  
Wenling picorna-like virus 3 YP 009336613.1  
Beihai picorna-like virus 91 APG78009.1  
Beihai picorna-like virus 82 YP 009333603.1  
Wenling crustacean virus 2 YP 009336690.1  
Beihai picorna-like virus 81 YP 009333502.1  
Wenzhou picorna-like virus 35 YP 009336976.1  
Beihai picorna-like virus 88 APG76709.1  
Beihai shrimp virus 1 YP 009333494.1

[illegible]
