# Supplementary figures and images for: Virome Temporal Variation During Sea Star Wasting Disease Progression in Pisaster ochraceus (Asteroidea, Echinodermata)
Source: Preprints.org preprint supplement (doi:10.20944/preprints202010.0171.v1), 2020-10-08

Structural

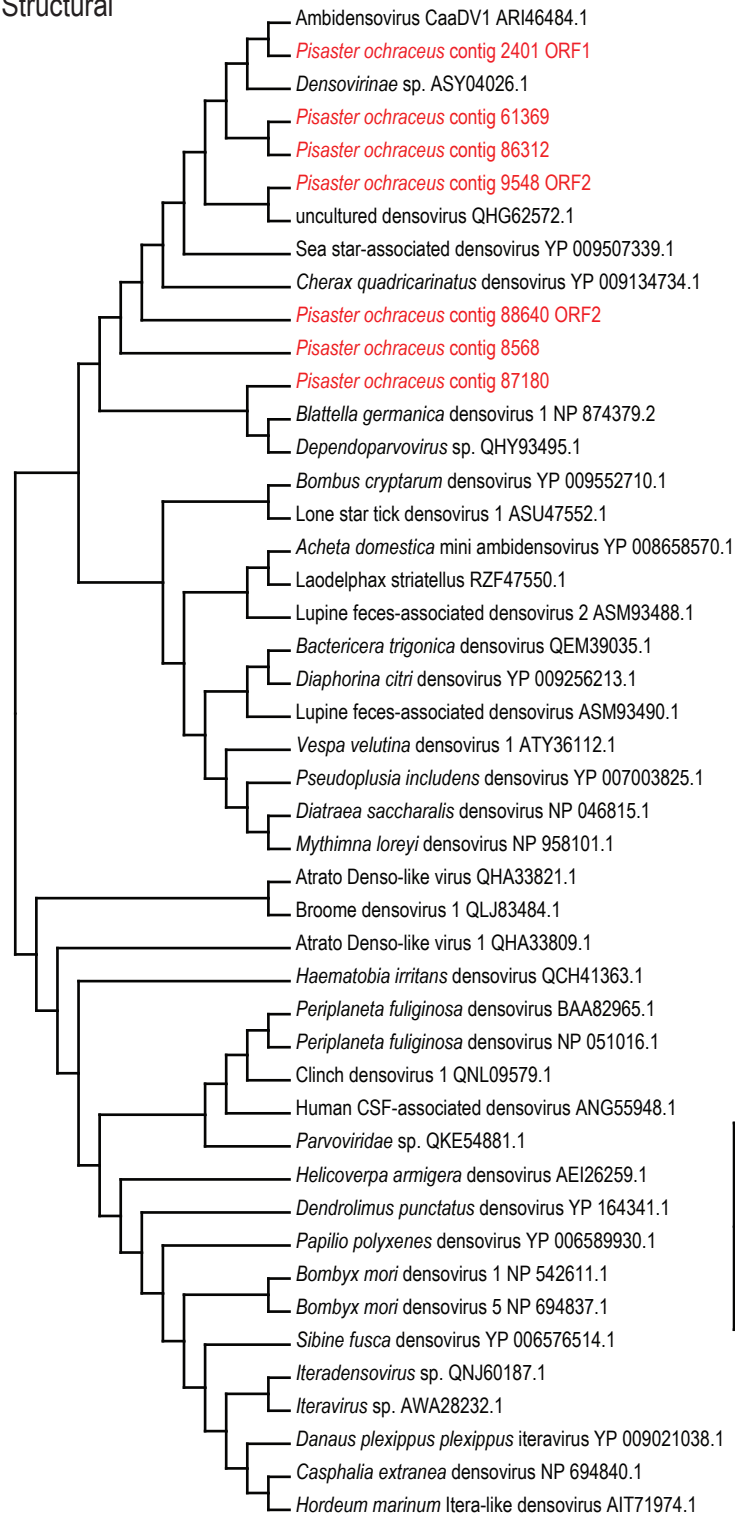

NS1

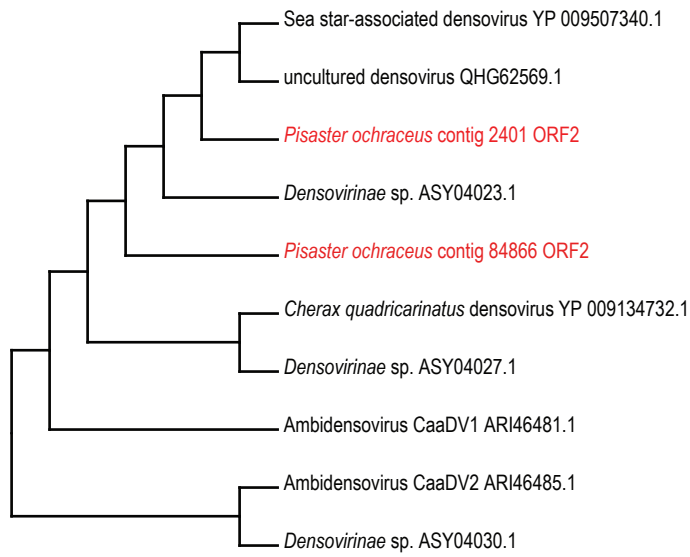

NS2

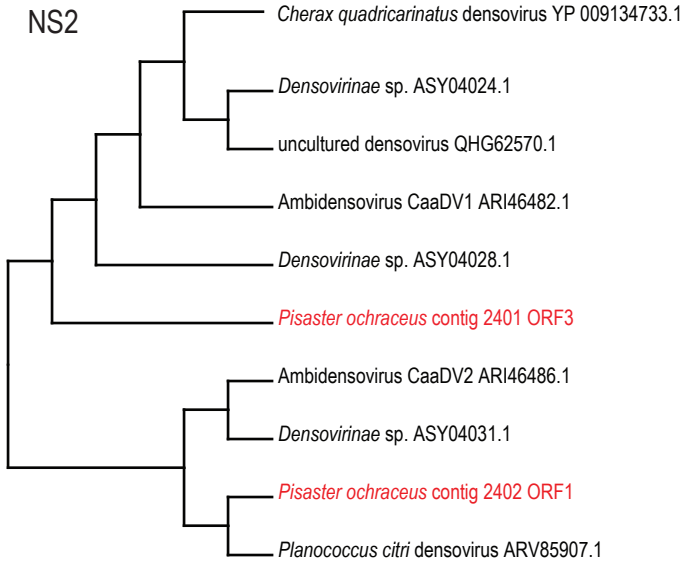

NS3

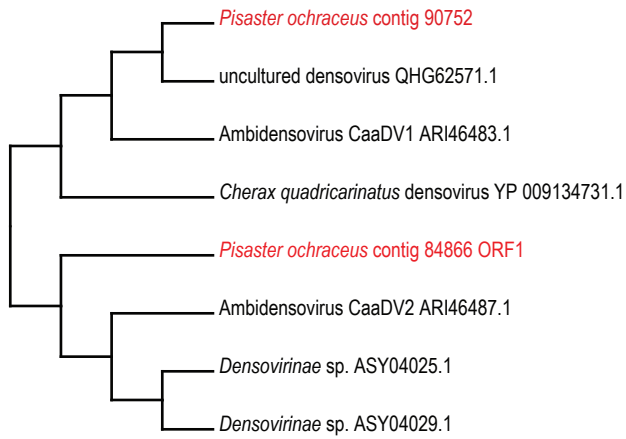

Supplement: Supplementary file 2 [file supplementary]

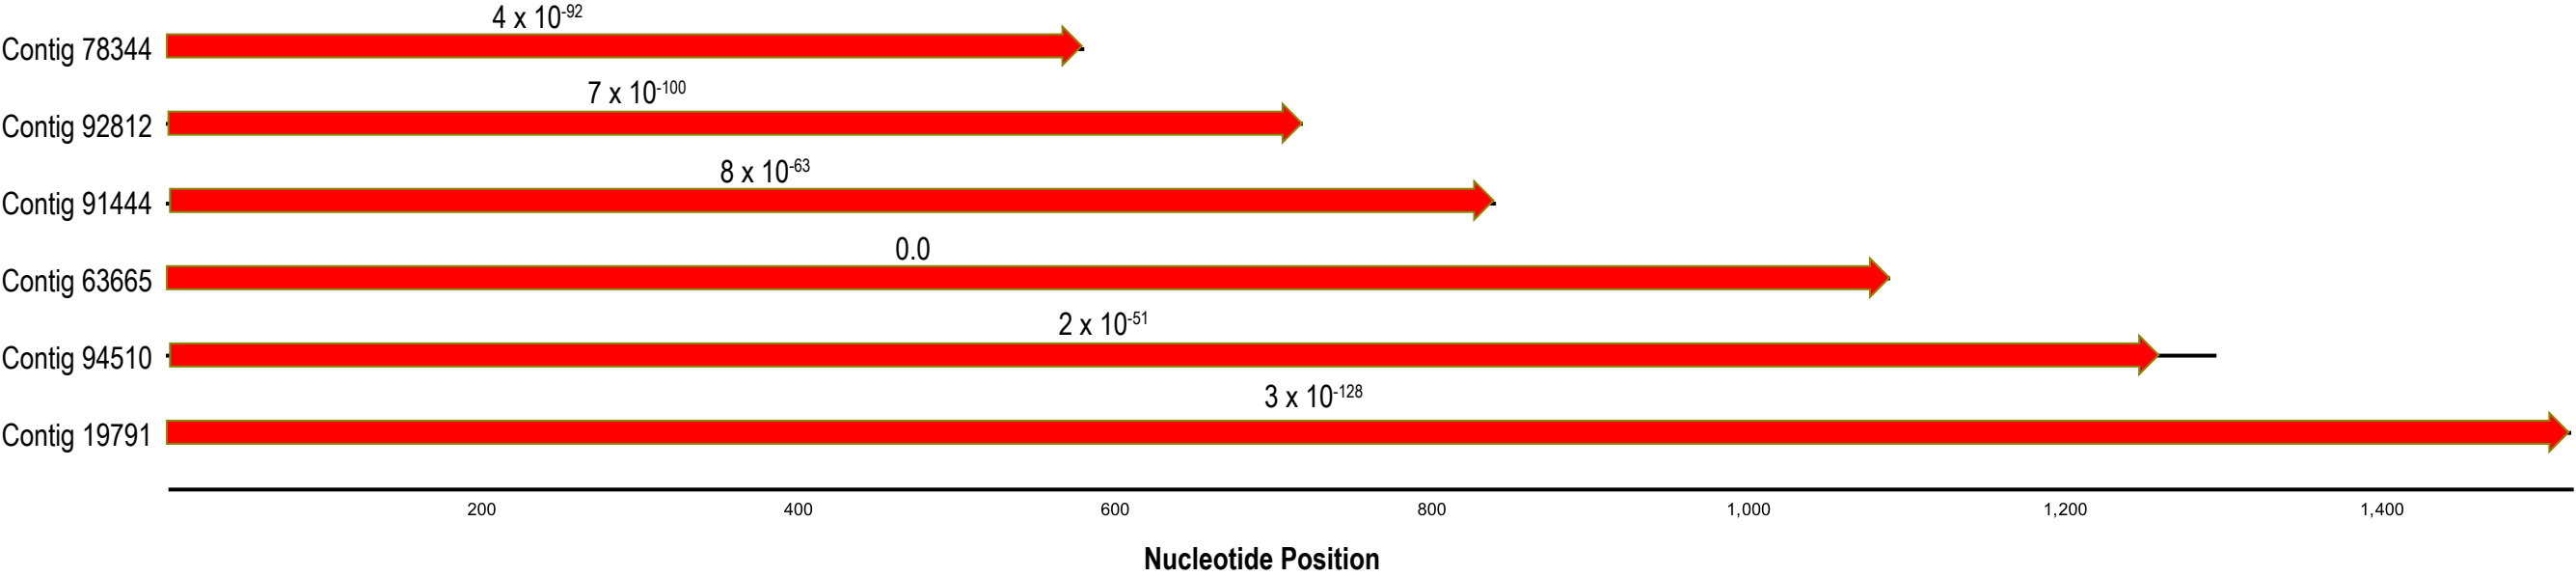

Supplement: Supplementary file 3 [file supplementary]

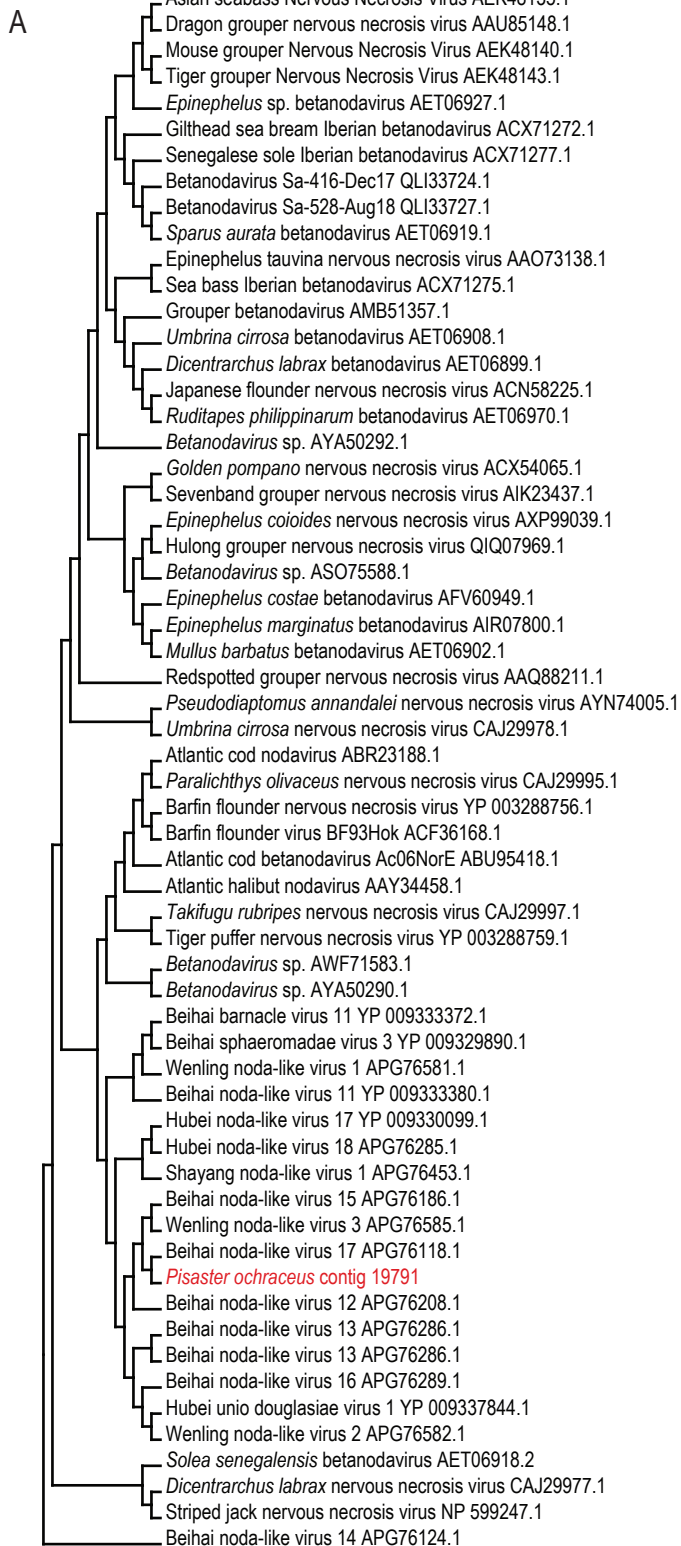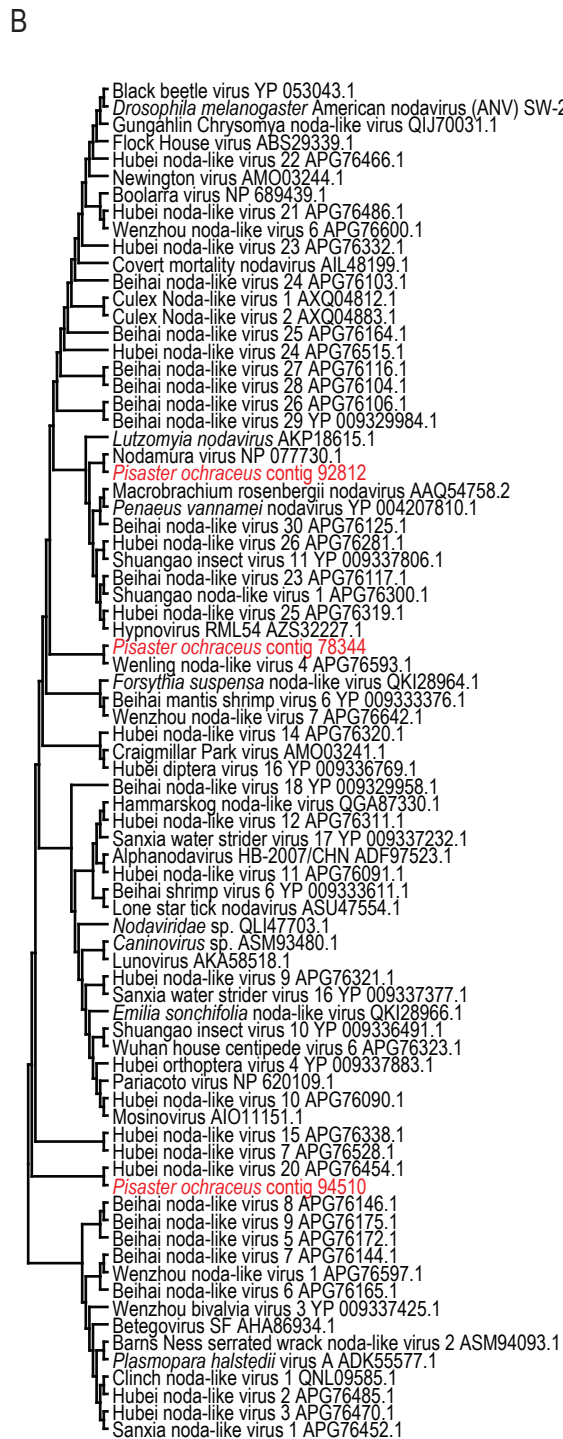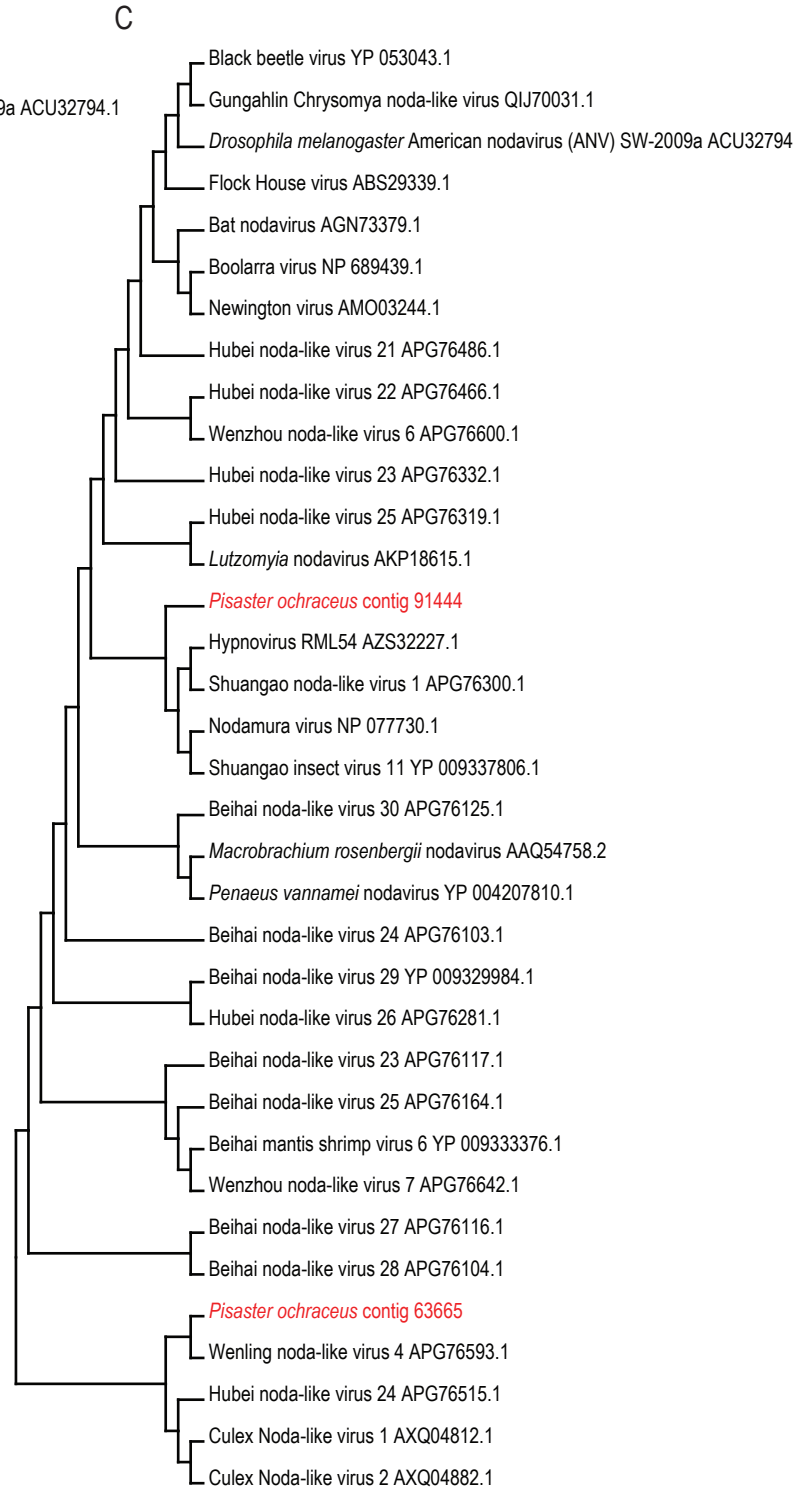

Supplement: Supplementary file 4 [file supplementary]
